# Supplementary material
Source: publisher figshare collection journal article supplement (https://acs.figshare.com/ndownloader/files/3851656)
Supplement: Supplementary file 1 [file 3851656]

# **Removal of Trace Arsenic Based on Biomimetic Separation**

*Bo Sun\*, Hao Zhai, Li-Bing Zhang, Chun-Xue Zhang, Xin-Shi Wu*

School of Chemistry and Chemical Engineering, Tianjin University of Technology, Tianjin, 300384,

P. R. China

Full postal address: No.191, Binshui West Road, Xiqing District, Tianjin, 300384, P. R. China

\*Corresponding author

Tel.: +86-22-23374289 ; Fax: +86-22-23374289; E-mail: sunbo\_tjlg@hotmail.com

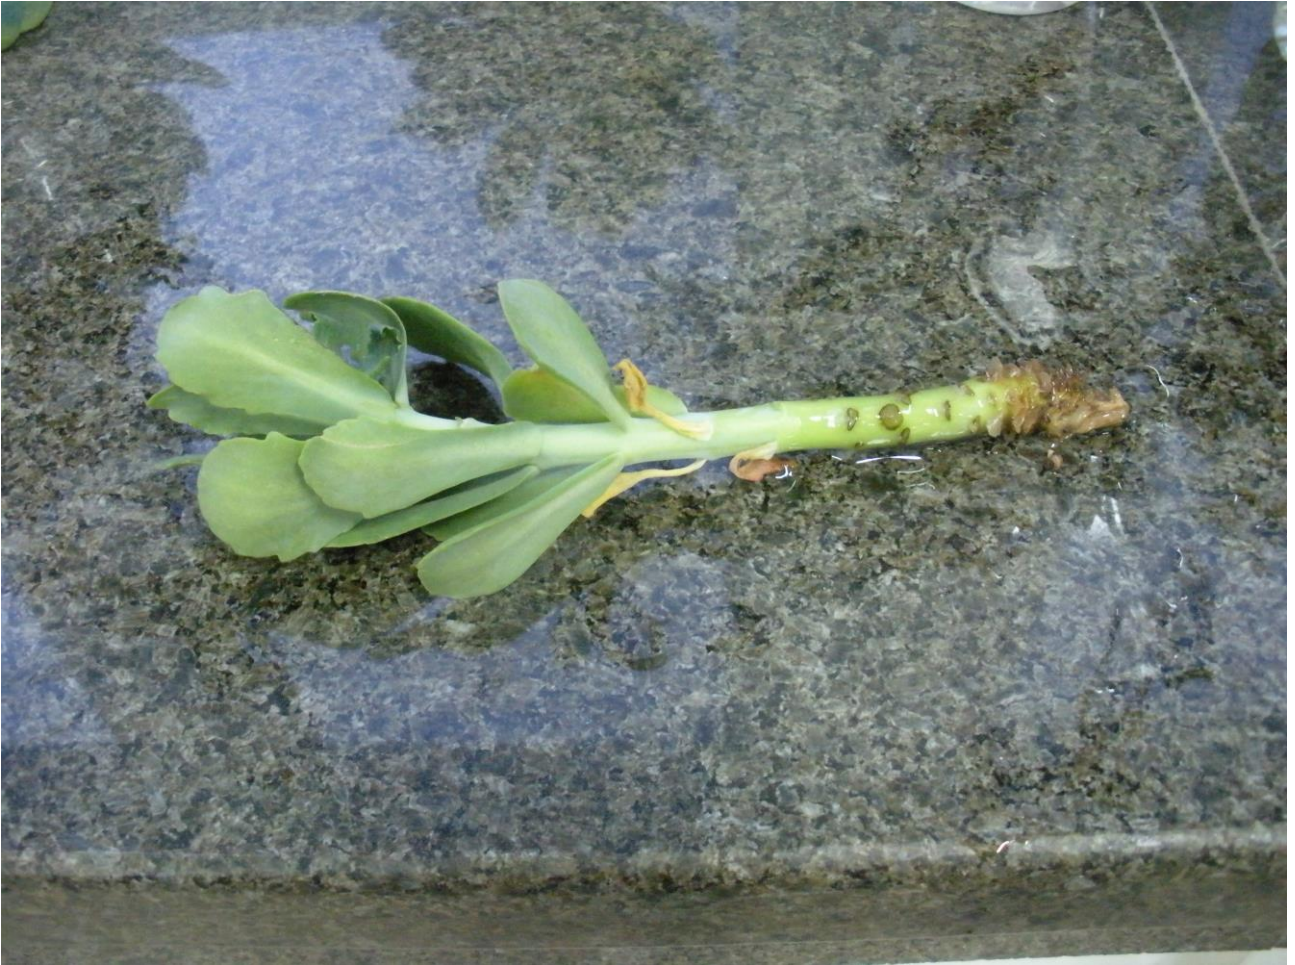

**Figure S1.** Photograph of *Sedum spectabile*

**Table S1. Comparison of Pb Contents in Roots and Leaves of Tested Plants Cultivated under Pb<sup>2+</sup> Stress <sup>a</sup>**

| The Tested Plants            | Pb Content in Root Cultivated under Pb <sup>2+</sup> Stress (mg/g) | Pb Content in Root Cultivated without Pb <sup>2+</sup> Stress (mg/g) | Pb Content in Leaves Cultivated under Pb <sup>2+</sup> Stress (mg/g) | Pb Content in Leaves Cultivated without Pb <sup>2+</sup> Stress (mg/g) |
|------------------------------|--------------------------------------------------------------------|----------------------------------------------------------------------|----------------------------------------------------------------------|------------------------------------------------------------------------|
| <i>Iris tectorum Maxim</i>   | 2.73                                                               | 0.97                                                                 | 0.09                                                                 | 0.04                                                                   |
| <i>Hemerocallis fulva</i>    | 1.22                                                               | 0.03                                                                 | 0.11                                                                 | 0.01                                                                   |
| <i>Philodendron 'con-go'</i> | 4.74                                                               | 0.01                                                                 | 0.57                                                                 | 0.02                                                                   |
| <i>Echevaria glauca</i>      | 4.83                                                               | ≤0.02                                                                | ≤0.02                                                                | ≤0.02                                                                  |
| <i>Echevaria secunda</i>     | 5.77                                                               | ≤0.02                                                                | ≤0.02                                                                | ≤0.02                                                                  |
| <i>Sedum spectabile</i>      | 16.21                                                              | ≤0.02                                                                | ≤0.02                                                                | ≤0.02                                                                  |

<sup>a</sup> Plants was cultivated in culture medium A (see below), the duration of the cultivation is 5 week (without Pb<sup>2+</sup> stress in the first week), 15–25 °C, total volume of culture solution is 200 mL. Every 7 days, about 20 mg of Pb<sup>2+</sup> ions was added into the culture medium, and totally 80 mg of Pb<sup>2+</sup> ions was added.

| Culture Medium | Ca(NO <sub>3</sub> ) <sub>2</sub> (mg/L) | KNO <sub>3</sub> (mg/L) | NH <sub>4</sub> H <sub>2</sub> PO <sub>4</sub> (mg/L) | MgSO <sub>4</sub> (mg/L) | NH <sub>4</sub> Cl (mg/L) | MgCl <sub>2</sub> (mg/L) |
|----------------|------------------------------------------|-------------------------|-------------------------------------------------------|--------------------------|---------------------------|--------------------------|
| A              | 820                                      | 607                     | 115                                                   | 241                      | –                         | –                        |

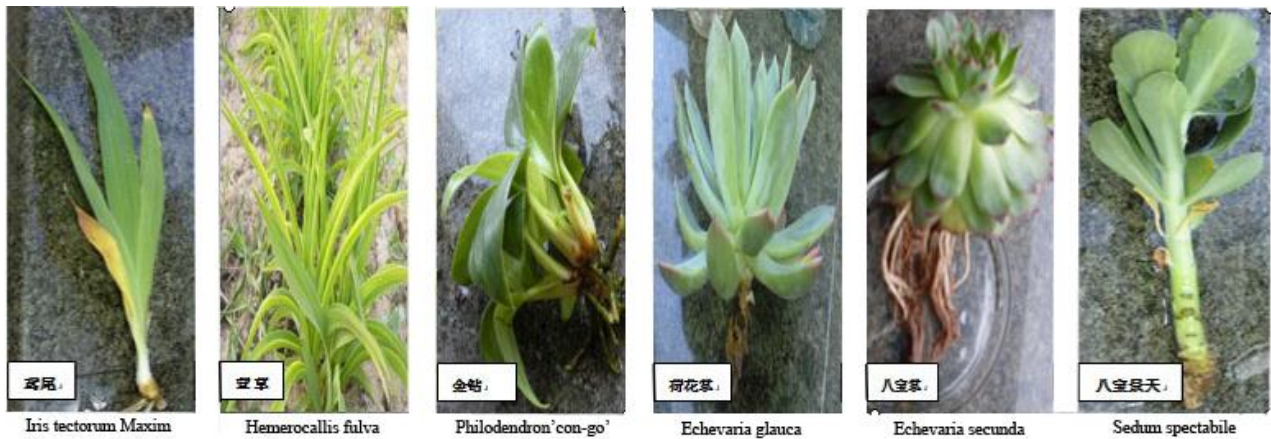

**Table S2. Comparison of Pb Contents in Roots and Leaves of *Sedum Spectabile* Cultivated under Pb<sup>2+</sup> Stress <sup>a</sup>**

| Duration of the Cultivation<br>(week) | Pb Content in Root Cultivated under<br>Pb <sup>2+</sup> Stress (mg/g) | Pb Content in Leaves Cultivated<br>under Pb <sup>2+</sup> Stress (mg/g) |
|---------------------------------------|-----------------------------------------------------------------------|-------------------------------------------------------------------------|
| 5                                     | 16.21                                                                 | ≤0.02                                                                   |
| 9                                     | 34.58                                                                 | 0.05                                                                    |

<sup>a</sup> *S. spectabile* was cultivated in culture medium A, 15–25 °C, total volume of culture solution is 200 mL. Every 7 days, about 20 mg of Pb<sup>2+</sup> ions was added into the culture medium.

**Table S3. Comparison of Elemental Contents of *Sedum Spectabile*'s Roots Cultivated under the Pb<sup>2+</sup> Stress <sup>a</sup>**

| Elements <sup>b</sup> | Contents of Elements in <i>S. Spectabile</i> 's Roots<br>Cultivated under Pb <sup>2+</sup> Stress (mg/g) <sup>c</sup> |         |         |         | Contents of Elements in <i>S. Spectabile</i> 's Roots<br>Cultivated without Pb <sup>2+</sup> Stress (mg/g) |         |         |         |
|-----------------------|-----------------------------------------------------------------------------------------------------------------------|---------|---------|---------|------------------------------------------------------------------------------------------------------------|---------|---------|---------|
|                       | Culture                                                                                                               | Culture | Culture | Culture | Culture                                                                                                    | Culture | Culture | Culture |
|                       | Medium                                                                                                                | Medium  | Medium  | Medium  | Medium                                                                                                     | Medium  | Medium  | Medium  |
|                       | A                                                                                                                     | B       | C       | D       | A                                                                                                          | B       | C       | D       |
| Pb                    | 34.58                                                                                                                 | 26.45   | 27.29   | 25.18   | ≤0.02                                                                                                      | ≤0.02   | ≤0.02   | ≤0.02   |
| Ca                    | 8.42                                                                                                                  | 14.82   | 14.28   | 9.63    | 7.28                                                                                                       | 9.33    | 13.04   | 8.51    |
| Mg                    | 2.53                                                                                                                  | 3.62    | 3.27    | 3.18    | 2.16                                                                                                       | 2.49    | 3.06    | 2.34    |
| P                     | 4.12                                                                                                                  | 2.49    | 3.75    | 2.79    | 2.61                                                                                                       | 2.03    | 2.69    | 2.02    |

<sup>a</sup>The duration of the cultivation is 9 weeks (without Pb<sup>2+</sup> stress in the first week), 15–25 °C, and total volume of culture solution is 200 mL. <sup>b</sup>The contents of Fe, Cu, Zn, Mo, Ni, Mn, Co, etc, in roots were comparatively low, and not listed in the table. <sup>c</sup>Every one week, 20 mg of Pb<sup>2+</sup> ions was added into each culture medium, and totally 160 mg of Pb<sup>2+</sup> ions was added.

**Table S4. Comparison of Elemental Contents of *Sedum Spectabile*'s Roots Cultivated under the Hg<sup>2+</sup> Stress <sup>a</sup>**

| Elements <sup>b</sup> | Contents of Elements in <i>S. Spectabile</i> 's Roots<br>Cultivated under Hg <sup>2+</sup> Stress (mg/g) <sup>c</sup> |                   |                   |                   | Contents of Elements in <i>S. Spectabile</i> 's Roots<br>Cultivated without Hg <sup>2+</sup> Stress (mg/g) |                   |                   |                   |
|-----------------------|-----------------------------------------------------------------------------------------------------------------------|-------------------|-------------------|-------------------|------------------------------------------------------------------------------------------------------------|-------------------|-------------------|-------------------|
|                       | Culture<br>Medium                                                                                                     | Culture<br>Medium | Culture<br>Medium | Culture<br>Medium | Culture<br>Medium                                                                                          | Culture<br>Medium | Culture<br>Medium | Culture<br>Medium |
|                       | A                                                                                                                     | B                 | C                 | D                 | A                                                                                                          | B                 | C                 | D                 |
|                       | Hg                                                                                                                    | 9.15              | 7.28              | 7.98              | 8.08                                                                                                       | ≤0.02             | ≤0.02             | ≤0.02             |
| Ca                    | 13.38                                                                                                                 | 18.87             | 11.78             | 12.05             | 26.25                                                                                                      | 20.01             | 24.04             | 24.56             |
| Mg                    | 4.62                                                                                                                  | 4.22              | 4.68              | 2.87              | 5.48                                                                                                       | 5.60              | 5.82              | 4.97              |
| P                     | 2.22                                                                                                                  | 3.53              | 2.40              | 1.42              | 3.64                                                                                                       | 2.35              | 4.01              | 2.89              |
| Fe                    | 1.24                                                                                                                  | 1.75              | 2.68              | 1.89              | 0.30                                                                                                       | 0.46              | 0.79              | 0.32              |
| Zn                    | 0.07                                                                                                                  | 0.19              | 0.26              | 0.12              | 0.03                                                                                                       | 0.05              | 0.02              | 0.02              |

<sup>a</sup>The duration of the cultivation is 9 weeks (without Hg<sup>2+</sup> stress in the first week), 25–35 °C, and total volume of culture solution is 200 mL. <sup>b</sup>The contents of Cu, Mn, Mo, Ni, Co, etc, in roots were comparatively low, and not listed in the table. <sup>c</sup>Every 7 days, 20 mg of Hg<sup>2+</sup> ions was added into each culture medium, and totally 160 mg of Hg<sup>2+</sup> ions was added.

**Table S5. Four Formulations in Hydroponic Culture**

| Culture<br>Medium | Ca(NO <sub>3</sub> ) <sub>2</sub><br>(mg/L) | KNO <sub>3</sub><br>(mg/L) | NH <sub>4</sub> H <sub>2</sub> PO <sub>4</sub><br>(mg/L) | MgSO <sub>4</sub><br>(mg/L) | NH <sub>4</sub> Cl<br>(mg/L) | MgCl <sub>2</sub><br>(mg/L) |
|-------------------|---------------------------------------------|----------------------------|----------------------------------------------------------|-----------------------------|------------------------------|-----------------------------|
| A                 | 820                                         | 607                        | 115                                                      | 241                         | –                            | –                           |
| B                 | 820                                         | 607                        | –                                                        | 241                         | 93                           | –                           |
| C                 | 820                                         | 607                        | 115                                                      | –                           | –                            | 190                         |
| D                 | –                                           | –                          | –                                                        | –                           | –                            | –                           |

**Table S6. Instrumental Parameters and Operating Conditions for ICP-OES**

---

|                                  |                                        |
|----------------------------------|----------------------------------------|
| Radio frequency (R.F.) power     | 1.2 kW                                 |
| Plasma gas flow rate             | 15 L/min                               |
| Flow rate of Argon auxiliary     | 1.5 L/min                              |
| Nebulizer gas flow rate          | 0.9 L/min                              |
| Precision (general)              | 1–3%                                   |
| As analytical line ( $\lambda$ ) | 193.6 nm (detection limit 0.03 mg/L)   |
| S analytical line ( $\lambda$ )  | 180.7 nm (detection limit 0.04 mg/L)   |
| Ca analytical line ( $\lambda$ ) | 396.8 nm (detection limit 0.003 mg/L)  |
| Mg analytical line ( $\lambda$ ) | 279.6 nm (detection limit 0.02 mg/L)   |
| P analytical line ( $\lambda$ )  | 213.6 nm (detection limit 0.05 mg/L)   |
| Fe analytical line ( $\lambda$ ) | 259.94 nm (detection limit 0.002 mg/L) |
| Cu analytical line ( $\lambda$ ) | 324.75 nm (detection limit 0.005 mg/L) |
| Mn analytical line ( $\lambda$ ) | 257.61 nm (detection limit 0.005 mg/L) |
| Zn analytical line ( $\lambda$ ) | 213.9 nm (detection limit 0.005 mg/L)  |
| Mo analytical line ( $\lambda$ ) | 202.03 nm (detection limit 0.004 mg/L) |
| Ni analytical line ( $\lambda$ ) | 231.60 nm (detection limit 0.01 mg/L)  |
| Co analytical line ( $\lambda$ ) | 228.62 nm (detection limit 0.005 mg/L) |

---



**Table S7. Comparison of Growth Status of *Sedum Spectabile* with and without As(III) Stress <sup>a</sup>**

| Cultural Environment             | Culture | Height of the Plant before | Height of the Plant after Cultivation |
|----------------------------------|---------|----------------------------|---------------------------------------|
|                                  | Medium  | Cultivation (cm)           | (cm)                                  |
| With As(III) stress <sup>b</sup> | A       | 26                         | 27                                    |
|                                  | B       | 27                         | 28                                    |
|                                  | C       | 28                         | 29                                    |
|                                  | D       | 27                         | 28                                    |
| Without As(III) stress           | A       | 21                         | 24                                    |
|                                  | B       | 21                         | 22                                    |
|                                  | C       | 22                         | 23                                    |
|                                  | D       | 24                         | 26                                    |

<sup>a</sup>The duration of the cultivation is 9 weeks (without As(III) stress in the first week), and total volume of culture solution is 200 mL, 25–35 °C. <sup>b</sup>Every 7 days, about 8 mg of As(III) was added into each culture medium, and totally 64 mg of As(III) was added.

**Table S8. Comparison of Growth Status of *Sedum Spectabile* with and without As(V) Stress <sup>a</sup>**

| Cultural Environment           | Culture Medium | Height of the Plant before Cultivation (cm) | Height of the Plant after Cultivation (cm) |
|--------------------------------|----------------|---------------------------------------------|--------------------------------------------|
| With As(V) stress <sup>b</sup> | A              | 23                                          | 24                                         |
|                                | B              | 21                                          | 22                                         |
|                                | C              | 22                                          | 23                                         |
|                                | D              | 27                                          | 28                                         |
| Without As(V) stress           | A              | 23                                          | 26                                         |
|                                | B              | 22                                          | 25                                         |
|                                | C              | 24                                          | 26                                         |
|                                | D              | 23                                          | 25                                         |

<sup>a</sup> The duration of the cultivation is 9 weeks (without As(V) stress in the first week), and total volume of culture solution is 200 mL, 25–35 °C. <sup>b</sup> Every 7 days, about 8 mg of As(V) was added into each culture medium, and totally 64 mg of As(V) was added.

**Table S9. Comparison of Elemental Contents of *Sedum Spectabile*'s Roots Cultivated under the As(III) Stress <sup>a</sup>**

| Elements <sup>b</sup> | Contents of Elements in <i>S. Spectabile</i> 's Roots<br>Cultivated under As(III) Stress (mg/g) <sup>c</sup> |                   |                   |                   | Contents of Elements in <i>S. Spectabile</i> 's Roots<br>Cultivated without As(III) Stress (mg/g) |                   |                   |                   |
|-----------------------|--------------------------------------------------------------------------------------------------------------|-------------------|-------------------|-------------------|---------------------------------------------------------------------------------------------------|-------------------|-------------------|-------------------|
|                       | Culture<br>Medium                                                                                            | Culture<br>Medium | Culture<br>Medium | Culture<br>Medium | Culture<br>Medium                                                                                 | Culture<br>Medium | Culture<br>Medium | Culture<br>Medium |
|                       | A                                                                                                            | B                 | C                 | D                 | A                                                                                                 | B                 | C                 | D                 |
|                       | As                                                                                                           | 0.60              | 1.83              | 0.76              | 0.23                                                                                              | ≤0.02             | ≤0.02             | ≤0.02             |
| Ca                    | 14.16                                                                                                        | 21.39             | 19.19             | 15.81             | 22.43                                                                                             | 22.04             | 23.07             | 12.75             |
| Mg                    | 4.69                                                                                                         | 7.52              | 2.62              | 4.90              | 4.26                                                                                              | 6.49              | 4.77              | 4.05              |
| P                     | 2.74                                                                                                         | 3.40              | 2.22              | 3.94              | 3.09                                                                                              | 1.91              | 3.26              | 2.22              |
| Fe                    | 0.56                                                                                                         | 0.34              | 0.17              | 0.23              | 0.27                                                                                              | 0.15              | 0.14              | 0.18              |
| Zn                    | 0.02                                                                                                         | 0.12              | 0.04              | 0.07              | 0.01                                                                                              | 0.07              | 0.02              | 0.02              |

<sup>a</sup> The duration of the cultivation is 9 weeks (without As(III) stress in the first week) , and total volume of culture solution is 200 mL, 25–35 °C. <sup>b</sup>The contents of Cu, Mo, Ni, Co, etc, in roots were comparatively low, and not listed in the table. <sup>c</sup>Every 7 days, 8 mg of As(III) was added into each culture medium, and totally about 64 mg of As(III) was added.

**Table S10. Comparison of Elemental Contents of *Sedum Spectabile*'s Roots Cultivated under the As(V) Stress <sup>a</sup>**

| Elements <sup>b</sup> | Contents of Elements in <i>S. Spectabile</i> 's Roots<br>Cultivated under As(V) Stress (mg/g) <sup>c</sup> |         |         |         | Contents of Elements in <i>S. Spectabile</i> 's Roots<br>Cultivated without As(V) Stress (mg/g) |         |         |         |
|-----------------------|------------------------------------------------------------------------------------------------------------|---------|---------|---------|-------------------------------------------------------------------------------------------------|---------|---------|---------|
|                       | Culture                                                                                                    | Culture | Culture | Culture | Culture                                                                                         | Culture | Culture | Culture |
|                       | Medium                                                                                                     | Medium  | Medium  | Medium  | Medium                                                                                          | Medium  | Medium  | Medium  |
|                       | A                                                                                                          | B       | C       | D       | A                                                                                               | B       | C       | D       |
| As                    | 0.50                                                                                                       | 0.78    | 0.21    | 0.28    | ≤0.02                                                                                           | ≤0.02   | ≤0.02   | ≤0.02   |
| Ca                    | 17.49                                                                                                      | 10.15   | 14.08   | 11.71   | 10.02                                                                                           | 5.60    | 8.19    | 7.72    |
| Mg                    | 2.59                                                                                                       | 2.57    | 3.07    | 2.00    | 3.03                                                                                            | 1.68    | 2.15    | 2.15    |
| P                     | 5.06                                                                                                       | 1.37    | 3.09    | 2.42    | 4.99                                                                                            | 2.33    | 4.62    | 2.85    |
| Fe                    | 1.05                                                                                                       | 0.99    | 0.73    | 1.05    | 0.57                                                                                            | 0.13    | 0.25    | 0.76    |
| Cu                    | 0.89                                                                                                       | 0.12    | 0.07    | 0.06    | ≤0.01                                                                                           | ≤0.01   | ≤0.01   | ≤0.01   |
| Zn                    | 0.04                                                                                                       | 0.07    | 0.04    | 0.03    | 0.01                                                                                            | 0.02    | 0.02    | 0.01    |

<sup>a</sup> The duration of the cultivation is 9 weeks [without As(V) stress in the first week], and total volume of culture solution is 200 mL, 25–35 °C. <sup>b</sup> The contents of Zn, Mo, Ni, Co, etc, in roots were comparatively low, and not listed in the table. <sup>c</sup> Every 7 days, 8 mg of As(V) was added into each culture medium, and totally about 64 mg of As(V) was added.

**Table S11. Simulated Oxidation of As(III) to As(V) in Plant's Roots <sup>a</sup>**

| Oxidizing Agent               | Molar Ratio of Oxidizing Agent to As<br>(mol/mol) | pH  | As(III)-Oxidized<br>(%) |
|-------------------------------|---------------------------------------------------|-----|-------------------------|
| H <sub>2</sub> O <sub>2</sub> | 6:1                                               | 3–4 | 85.0                    |
| Fe <sup>3+</sup>              | 6:1                                               | 3–4 | 0.0                     |
| Air <sup>b</sup>              | –                                                 | 4–5 | 0.0                     |

<sup>a</sup>Initial concentration of As(III) (added in the form of Na<sub>3</sub>AsO<sub>3</sub>/NaAsO<sub>2</sub>) = 16.97 mg/L, total volume of solution = 200 mL, temperature = 30 °C, treatment time = 24 h. <sup>c</sup>Continuously provided

**Table S12. Simulated Reduction of As(V) to As(III) in Plant's Roots <sup>a</sup>**

| Reducing Agent                               | Molar Ratio of Reducing Agent to As<br>(mol/mol) | As(V)-Reduced<br>(%) |
|----------------------------------------------|--------------------------------------------------|----------------------|
| Cysteine                                     | 2:1                                              | 65.2                 |
| Vitamin C                                    | 1:1                                              | 22.5                 |
| H <sub>2</sub> C <sub>2</sub> O <sub>4</sub> | 1:1                                              | 4.7                  |

<sup>a</sup>Initial concentration of As(V) (added in the form of Na<sub>3</sub>AsO<sub>4</sub>) = 16.89 mg/L, total volume of solution = 200 mL, pH 4–5, temperature = 30 °C, treatment time = 24 h
